# Supplementary material for: IR spectra of cationic 1,5,9-triazacoronene and two of its cationic derivatives
Source: Royal Society of Chemistry journal article supplement (doi:10.1039/d4cp03004d), 2024-01-01
Supplement: d4cp03004d1.pdf [file d4cp03004d1.pdf]

# Electronic Supplementary Information to IR spectra of cationic 1,5,9-triazacoronene and two of its cationic derivatives

Jerry Kamer,<sup>†</sup> Domenik Schleier,<sup>†,‡</sup> Andy Jiao,<sup>¶</sup> Grégory Schneider,<sup>¶</sup> Jonathan Martens,<sup>§</sup> Giel Berden,<sup>§</sup> Jos Oomens,<sup>§</sup> and Jordy Bouwman<sup>\*,||,⊥,#</sup>

<sup>†</sup>*Laboratory for Astrophysics, Leiden Observatory, Leiden University, NL 2300 RA Leiden, The Netherlands*

<sup>‡</sup>*Institut für Optik und Atomare Physik, Technische Universität Berlin, Hardenbergstrasse 36, Berlin 10623, Germany.*

<sup>¶</sup>*Leiden Institute of Chemistry, Leiden University, PO Box 9502, 2300 RA Leiden, The Netherlands.*

<sup>§</sup>*Institute for Molecules and Materials, FELIX Laboratory, Radboud University, Toernooiveld 7, 6525 ED Nijmegen, The Netherlands.*

<sup>||</sup>*Laboratory for Atmospheric and Space Physics, University of Colorado, Boulder, CO 80303, USA*

<sup>⊥</sup>*Department of Chemistry, University of Colorado, Boulder, CO 80309, USA*

<sup>#</sup>*Institute for Modeling Plasma, Atmospheres and Cosmic Dust (IMPACT), NASA/SSERVI, Boulder, CO 80309, USA*

E-mail: [jordy.bouwman@colorado.edu](mailto:jordy.bouwman@colorado.edu)

This Electronic Supplementary Information contains further information to the main manuscript. First, we present a zoom-in of the experimental and simulated IR spectra of **TACH**<sup>+</sup> between 820 and 1260 cm<sup>-1</sup>. Next, we show the different energies of three possible isomers formed after losing a hydrogen atom from **TAC**<sup>+</sup> from different positions. Then, we present the calculated IR spectra of the 16 [**TAC-H+H<sub>2</sub>O**]<sup>+</sup> isomers that we considered as potential products ions. Lastly, we show the coordinates of **TAC**<sup>+</sup> and **TACH**<sup>+</sup> used to calculate the IR spectra.

# Experimental and simulated mid-IR spectra of $\text{TACH}^+$ in the $800 - 1300 \text{ cm}^{-1}$ range

Here we present a zoomed-in version of the experimental and simulated IR spectra of  $\text{TACH}^+$  reported in the main manuscript (see Fig. S1). Most notably, the  $\text{TACH}^+$  IRMPD spectrum displays no clear features between  $820$  and  $1260 \text{ cm}^{-1}$ , while modes are predicted to fall in this range.

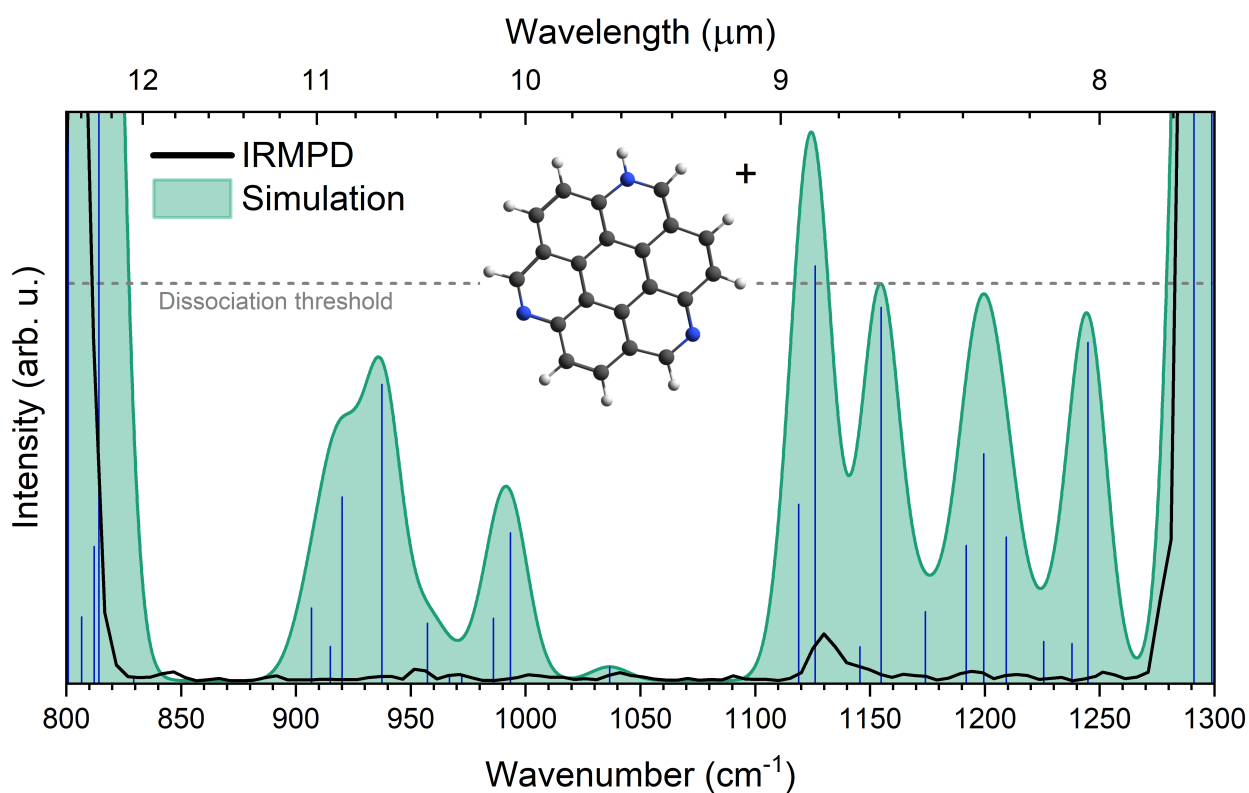

Figure S1: Experimental IRMPD (black) and simulated IR (blue vertical lines) spectra of  $\text{TACH}^+$ . The B3LYP/6-311++G(d,p) computed spectrum (blue sticks) is uniformly scaled with a factor of 0.9679 and convolved with a  $20 \text{ cm}^{-1}$  FWHM Gaussian function (green shaded area). The horizontal grey, dotted line indicates an apparent cut-off. Exciting modes with a lower intensity than this line does not lift the energy of the molecule over the dissociation threshold.

## Energies of $[\text{TAC}-\text{H}]^+$ isomers

Here we present the energies of three isomers that can form upon losing a hydrogen atom from three distinctly different positions in  $\text{TAC}^{\bullet+}$  (see Fig. S2). The isomer resulting from the loss of a hydrogen from the CH group adjacent to a nitrogen atom is found to be lowest in energy, according to our calculations at a B3LYP/6-311++G(d,p) level of theory.

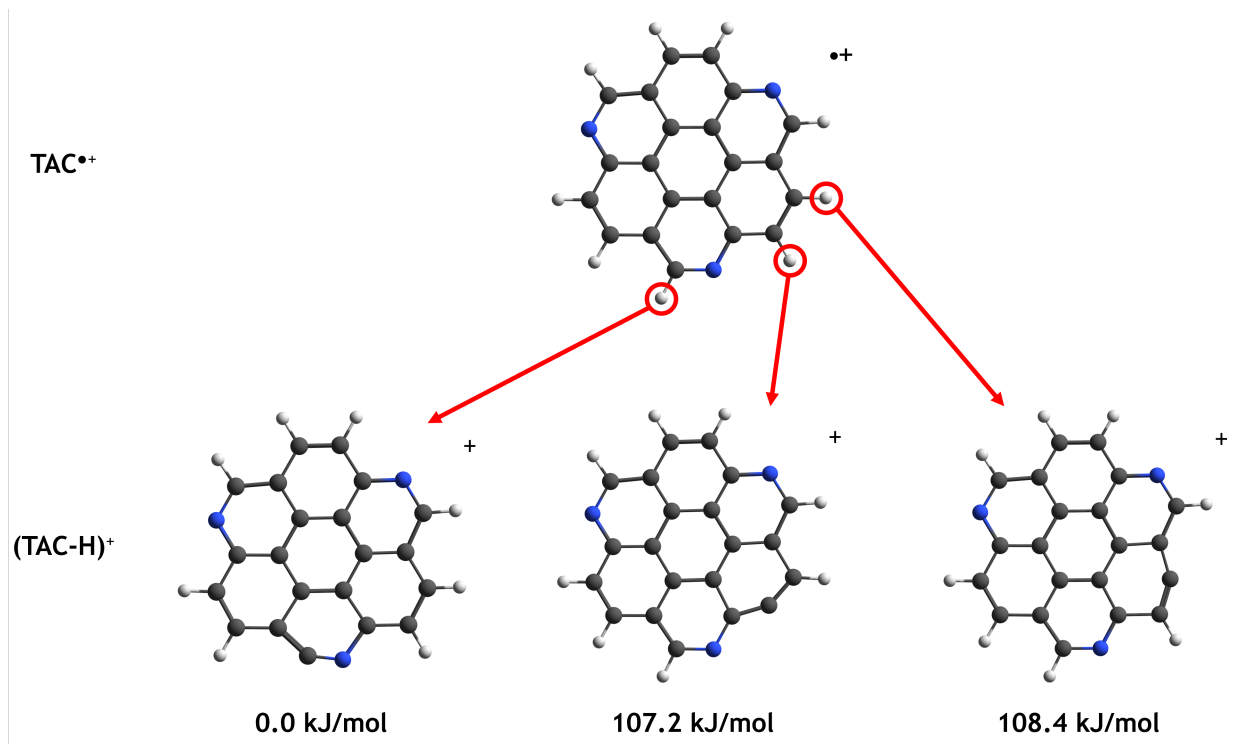

Figure S2: Geometries and relative energies of three different  $[\text{TAC}-\text{H}]^+$  isomers calculated at B3LYP/6-311++G(d,p) level of theory. The circled hydrogen atoms on  $\text{TAC}^{\bullet+}$  depict the hydrogen that is removed and the arrows point toward the resulting isomer. The energies are depicted with respect to the lowest energetic isomer of  $[\text{TAC}-\text{H}]^+$ .

## Calculated spectra of all considered $[\text{TAC}-\text{H}+\text{H}_2\text{O}]^+$ isomers

Here we present the calculated mid-IR spectra of the 16 isomers that we considered as  $[\text{TAC}-\text{H}+\text{H}_2\text{O}]^+$  products (see Fig. S3). We propose that isomer **5** is the most likely candidate for  $[\text{TAC}-\text{H}+\text{H}_2\text{O}]^+$ , since it is the lowest in energy and its simulated spectrum matches well with the IRMPD spectrum of the  $[\text{TAC}-\text{H}+\text{H}_2\text{O}]^+$  product ion. Other isomers such as **15** and **16** also provide a good match with the IRMPD spectrum, however, their energies are rather high with respect to isomer **5** and these isomers lack a feature at  $1718\text{ cm}^{-1}$ . Therefore, we conclude that these are not the most likely candidate for  $[\text{TAC}-\text{H}+\text{H}_2\text{O}]^+$ . This does not necessarily mean that isomer **5** is the only contributor to the IRMPD and the other isomers may contribute to the experimental spectrum.

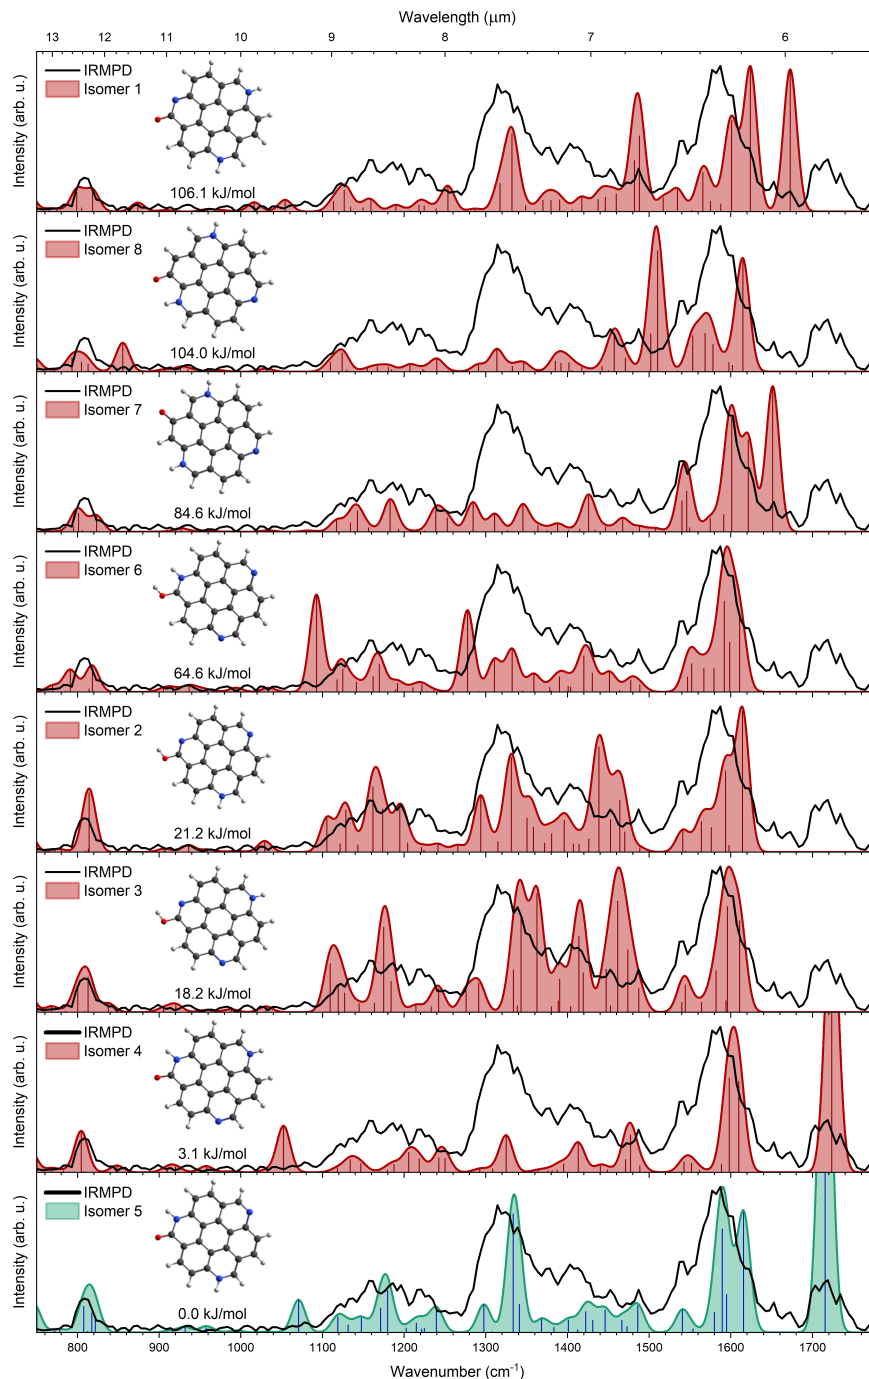

Figure S3: Experimental IRMPD spectrum (black) compared to simulated IR spectra of all considered isomers of  $[\text{TAC}-\text{H}+\text{H}_2\text{O}]^+$ . Also shown are the structures of the various  $[\text{TAC}-\text{H}+\text{H}_2\text{O}]^+$  isomers and their relative energies calculated using the B3LYP functional in combination with the 6-311++G(d,p) basis set. The simulated spectrum in green indicates our tentative assignment that isomer **5** is likely the dominant isomer. The B3LYP/6-311++G(d,p) computed stick spectra are uniformly scaled with a factor of 0.9679. The calculated spectra are also convolved with a  $20\text{ cm}^{-1}$  FWHM Gaussian function to facilitate comparison with the experimental spectrum. All spectra are normalized with respect to their most intense peak in the  $750\text{-}1650\text{ cm}^{-1}$  wavenumber range.

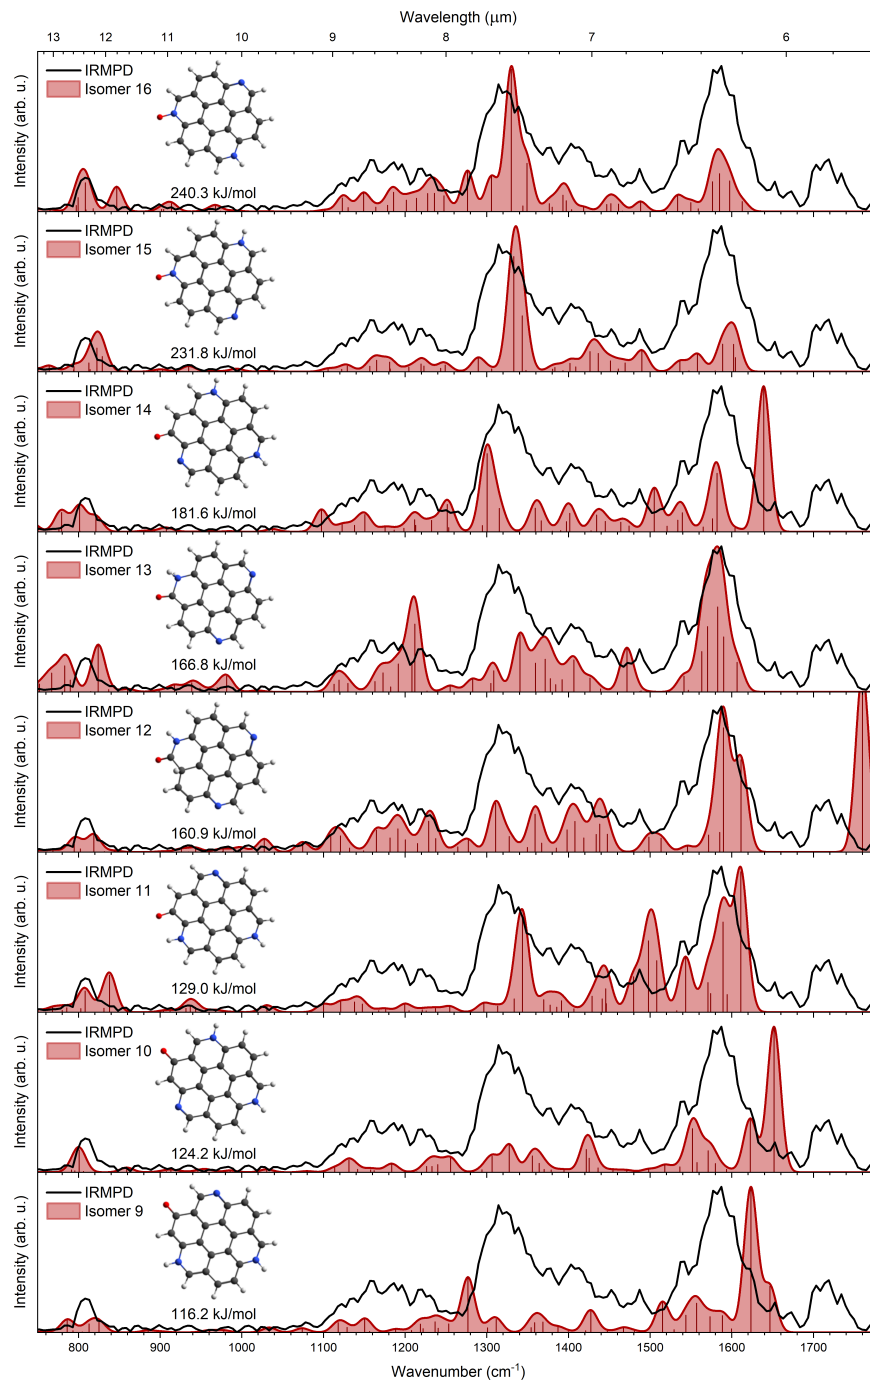

Figure S3 (Cont.)

## Coordinates of $\text{TAC}^+$ and $\text{TACH}^+$

Here we presented the coordinates of  $\text{TAC}^+$  and  $\text{TACH}^+$  that were used to calculate the IR spectra presented in the main manuscript.

**Table S1: Cartesian coordinates of the molecular structure of  $\text{TAC}^+$ .**

| Atom | Coordinates |           |          |
|------|-------------|-----------|----------|
|      | x           | y         | z        |
| C    | 2.343363    | -2.831567 | 0.000000 |
| C    | 2.441080    | -1.414550 | 0.000000 |
| C    | 1.227137    | -0.700177 | 0.000000 |
| C    | 0.008865    | -1.409349 | 0.000000 |
| C    | 0.032092    | -2.816647 | 0.000000 |
| C    | 1.218829    | 0.711115  | 0.000000 |
| C    | -1.218304   | -0.710566 | 0.000000 |
| C    | -1.227304   | 0.692024  | 0.000000 |
| C    | 0.000000    | 1.407314  | 0.000000 |
| C    | -2.466785   | 1.384110  | 0.000000 |
| C    | -3.655586   | -0.598442 | 0.000000 |
| C    | -2.455146   | -1.411283 | 0.000000 |
| C    | -2.430551   | -2.821576 | 0.000000 |
| C    | -1.223933   | -3.510473 | 0.000000 |
| H    | -1.202872   | -4.594065 | 0.000000 |
| H    | -3.362957   | -3.374470 | 0.000000 |
| H    | 3.249407    | -3.431837 | 0.000000 |
| H    | -4.622094   | -1.097693 | 0.000000 |
| C    | 3.671975    | -0.664335 | 0.000000 |
| C    | 3.671439    | 0.705891  | 0.000000 |
| C    | 2.442357    | 1.443741  | 0.000000 |
| H    | 4.612702    | -1.203561 | 0.000000 |
| H    | 4.596997    | 1.268094  | 0.000000 |
| C    | 1.301069    | 3.447027  | 0.000000 |
| C    | 0.011601    | 2.816789  | 0.000000 |
| H    | 1.359724    | 4.533148  | 0.000000 |
| C    | -2.442841   | 2.788733  | 0.000000 |
| H    | -3.386345   | 3.321114  | 0.000000 |
| C    | -1.228657   | 3.492319  | 0.000000 |
| H    | -1.247479   | 4.576922  | 0.000000 |
| N    | 2.452632    | 2.803175  | 0.000000 |
| N    | -3.670011   | 0.704506  | 0.000000 |
| N    | 1.200053    | -3.507431 | 0.000000 |



**Table S2: Cartesian coordinates of the molecular structure of TACH<sup>+</sup>.**

| Atom | Coordinates |           |          |
|------|-------------|-----------|----------|
|      | x           | y         | z        |
| C    | -3.646949   | 0.587074  | 0.000000 |
| C    | -2.456815   | 1.388059  | 0.000000 |
| C    | -1.234483   | 0.691628  | 0.000000 |
| C    | -1.241235   | -0.719561 | 0.000000 |
| C    | -2.475815   | -1.404999 | 0.000000 |
| C    | 0.000000    | 1.389690  | 0.000000 |
| C    | -0.022262   | -1.432275 | 0.000000 |
| C    | 1.208809    | -0.734174 | 0.000000 |
| C    | 1.222632    | 0.676715  | 0.000000 |
| C    | 2.418576    | -1.466367 | 0.000000 |
| C    | 1.269348    | -3.465443 | 0.000000 |
| C    | -0.014760   | -2.839075 | 0.000000 |
| C    | -1.265952   | -3.522988 | 0.000000 |
| C    | -2.455549   | -2.830283 | 0.000000 |
| H    | -3.405499   | -3.350499 | 0.000000 |
| H    | -1.274228   | -4.607283 | 0.000000 |
| H    | -4.615172   | 1.083098  | 0.000000 |
| H    | 1.326281    | -4.551696 | 0.000000 |
| C    | -2.427831   | 2.808363  | 0.000000 |
| C    | -1.235827   | 3.504159  | 0.000000 |
| C    | -0.012550   | 2.795927  | 0.000000 |
| H    | -3.362247   | 3.358308  | 0.000000 |
| H    | -1.236558   | 4.588389  | 0.000000 |
| C    | 2.399553    | 2.771745  | 0.000000 |
| C    | 2.462926    | 1.376896  | 0.000000 |
| H    | 3.286046    | 3.393683  | 0.000000 |
| C    | 3.655109    | -0.744409 | 0.000000 |
| H    | 4.572486    | -1.320285 | 0.000000 |
| C    | 3.681432    | 0.625125  | 0.000000 |
| H    | 4.628918    | 1.151463  | 0.000000 |
| N    | 1.221948    | 3.420766  | 0.000000 |
| N    | 2.423324    | -2.827044 | 0.000000 |
| N    | -3.663718   | -0.724422 | 0.000000 |
| H    | 1.238961    | 4.434882  | 0.000000 |
